# Supplementary material for: Effect of a Plant-Based vs Omnivorous Soul Food Diet on Weight and Lipid Levels Among African American Adults: A Randomized Clinical Trial
Source: PubMed Central journal article supplement (PMC9857469; doi:10.1001/jamanetworkopen.2022.50626), 2023-01-12
Supplement: jamanetwopen-e2250626-s002.pdf [file jamanetwopen-e2250626-s002.pdf]

## Data Sharing Statement

Turner-McGrievy. Effect of a Plant-Based vs Omnivorous Soul Food Diet on Weight and Lipid Levels Among African American Adults. *JAMA Netw Open*. Published January 12, 2023. doi:10.1001/jamanetworkopen.2022.50626

### Data

**Data available:** No

### Additional Information

**Explanation for why data not available:** Once all papers from our group have been published from the data, we plan to release it for use by others.
